# Supplementary material for: Laparoscopic vs. Transabdominal Treatment for Overflow Fecal Incontinence Due to Residual Aganglionosis or Transition Zone Pathology in Hirschsprung's Disease Reoperation
Source: Front Pediatr. 2021 Apr 27;9:600316. doi: 10.3389/fped.2021.600316 (PMC8111174; doi:10.3389/fped.2021.600316)
Supplement: Supplementary file 3 [file Table_3.XLSX]

## Sheet: Sheet1
Supplementary table-3 Heikkinen defecation function score
	score
	0	1	2
Frequency of defecation(times/day)	Very often	3-5	1-2
Fecal consistency	Liquid	Loose	Normal
Soiling	Constant	Soiling by stress/ diarrhea	No
Sensation of rectal fullness	Absent	Uncertain	Normal
Ability to hold back	Missing	Seconds	Minutes
Discrimination between formed,loose or gaseous	Absent	Defective	Intact
Need treatment (enema,drug,diaper )	Continuously	Occasionally	No
Excellent(normal bower habits) 14 points, Good(social continence,none or few limitation in social life ) 10-13 points, Fair(marked limitation in social life ) 5-9 points, Poor(total incontinence) 0-4 points
